# Supplementary material
Source: publisher figshare collection journal article supplement (https://gsajournals.figshare.com/ndownloader/files/27479705)
Supplement: Supplementary file 1 [file 27479705]

## Sheet: Sheet1
File S5: Chemoreceptor geneIDs for all Strongyloides species
A list of chemoreceptor gene IDs for all Strongyloides species (Wheeler et al. 2020; Langeland et al. 2020).
Strongyloides stercoralis		Strongyloides ratti		Strongyloides papillosus		Strongyloides venezuelensis
SSTP_0000002950		SRAE_2000512000		SPAL_0000018500		SVE_0000845350
SSTP_0000020000		SRAE_0000024500		SPAL_0000051900		SVE_0001071900
SSTP_0000021600		SRAE_1000230900		SPAL_0000052200		SVE_0001600
SSTP_0000076300		SRAE_2000459500		SPAL_0000076300		SVE_0008500
SSTP_0000081200		SRAE_2000457800		SPAL_0000084400		SVE_0018000
SSTP_0000113900		SRAE_1000315500		SPAL_0000091700		SVE_0037600
SSTP_0000114333		SRAE_2000474400		SPAL_0000124175		SVE_0041800
SSTP_0000142400		SRAE_2000507650		SPAL_0000124200		SVE_0045400
SSTP_0000166700		SRAE_0000000250		SPAL_0000140800		SVE_0049900
SSTP_0000207250		SRAE_2000399900		SPAL_0000165450		SVE_0078700
SSTP_0000209200		SRAE_2000420200		SPAL_0000170500		SVE_0083800
SSTP_0000209700		SRAE_X000212700		SPAL_0000181600		SVE_0085400
SSTP_0000210100		SRAE_X000074900		SPAL_0000190700		SVE_0086100
SSTP_0000210700		SRAE_1000060400		SPAL_0000191400		SVE_0088500
SSTP_0000210900		SRAE_2000389700		SPAL_0000191700		SVE_0092900
SSTP_0000211000		SRAE_2000432200		SPAL_0000247100		SVE_0108400
SSTP_0000211050		SRAE_X000182300		SPAL_0000252100		SVE_0112700
SSTP_0000246600		SRAE_2000043400		SPAL_0000255020		SVE_0113600
SSTP_0000247200		SRAE_X000094550		SPAL_0000255040		SVE_0130300
SSTP_0000251600		SRAE_X000010100		SPAL_0000255060		SVE_0140800
SSTP_0000257200		SRAE_1000351300		SPAL_0000255080		SVE_0158500
SSTP_0000260700		SRAE_2000377100		SPAL_0000260300		SVE_0162600
SSTP_0000287100		SRAE_2000446700		SPAL_0000262900		SVE_0177900
SSTP_0000322300		SRAE_0000032000		SPAL_0000263100		SVE_0195100
SSTP_0000322400		SRAE_X000170800		SPAL_0000276400		SVE_0209600
SSTP_0000346000		SRAE_2000471000		SPAL_0000281600		SVE_0222700
SSTP_0000356800		SRAE_2000128200		SPAL_0000321300		SVE_0230800
SSTP_0000363000		SRAE_1000309000		SPAL_0000325368		SVE_0230900
SSTP_0000364850		SRAE_1000259700		SPAL_0000325400		SVE_0238000
SSTP_0000364900		SRAE_X000186100		SPAL_0000341500		SVE_0238100
SSTP_0000370200		SRAE_2000498600		SPAL_0000364300		SVE_0248800
SSTP_0000370900		SRAE_2000482900		SPAL_0000368200		SVE_0259300
SSTP_0000379200		SRAE_2000380600		SPAL_0000380400		SVE_0266000
SSTP_0000379400		SRAE_0000012400		SPAL_0000380500		SVE_0266100
SSTP_0000379500		SRAE_1000256800		SPAL_0000411500		SVE_0269400
SSTP_0000381900		SRAE_2000105700		SPAL_0000416250		SVE_0272700
SSTP_0000382000		SRAE_1000300300		SPAL_0000424700		SVE_0300700
SSTP_0000385000		SRAE_1000020400		SPAL_0000440500		SVE_0319100
SSTP_0000391300		SRAE_0000024300		SPAL_0000442200		SVE_0328000
SSTP_0000393100		SRAE_X000246550		SPAL_0000464500		SVE_0329100
SSTP_0000396800		SRAE_1000159300		SPAL_0000507100		SVE_0329200
SSTP_0000415000		SRAE_1000280100		SPAL_0000514900		SVE_0329300
SSTP_0000418200		SRAE_1000322700		SPAL_0000575800		SVE_0329400
SSTP_0000419100		SRAE_1000322600		SPAL_0000578500		SVE_0329800
SSTP_0000423100		SRAE_1000322800		SPAL_0000596150		SVE_0338500
SSTP_0000425000		SRAE_2000422600		SPAL_0000606100		SVE_0338600
SSTP_0000425100		SRAE_2000474200		SPAL_0000606300		SVE_0338800
SSTP_0000425200		SRAE_1000048950		SPAL_0000611200		SVE_0340800
SSTP_0000425300		SRAE_X000050400		SPAL_0000619700		SVE_0340900
SSTP_0000425400		SRAE_2000443300		SPAL_0000624400		SVE_0341200
SSTP_0000425500		SRAE_1000078900		SPAL_0000635825		SVE_0341700
SSTP_0000425600		SRAE_X000198500		SPAL_0000635850		SVE_0341800
SSTP_0000425700		SRAE_1000231800		SPAL_0000635875		SVE_0342700
SSTP_0000425800		SRAE_0000000700		SPAL_0000645000		SVE_0350500
SSTP_0000426350		SRAE_0000002700		SPAL_0000649000		SVE_0352200
SSTP_0000431100		SRAE_0000009200		SPAL_0000653200		SVE_0360400
SSTP_0000442300		SRAE_0000009300		SPAL_0000656300		SVE_0366100
SSTP_0000443050		SRAE_0000009500		SPAL_0000657400		SVE_0366500
SSTP_0000451200		SRAE_0000016250		SPAL_0000673200		SVE_0366600
SSTP_0000451300		SRAE_0000024200		SPAL_0000683400		SVE_0376900
SSTP_0000477000		SRAE_0000025100		SPAL_0000692300		SVE_0379800
SSTP_0000477100		SRAE_0000033100		SPAL_0000718300		SVE_0392500
SSTP_0000477300		SRAE_0000045400		SPAL_0000744100		SVE_0392800
SSTP_0000478400		SRAE_1000000750		SPAL_0000766500		SVE_0393100
SSTP_0000479900		SRAE_1000001000		SPAL_0000796600		SVE_0417700
SSTP_0000488200		SRAE_1000004800		SPAL_0000798000		SVE_0422000
SSTP_0000491700		SRAE_1000020200		SPAL_0000858300		SVE_0422100
SSTP_0000498700		SRAE_1000020300		SPAL_0000868200		SVE_0422300
SSTP_0000523600		SRAE_1000032000		SPAL_0000872800		SVE_0495300
SSTP_0000525400		SRAE_1000075200		SPAL_0000935900		SVE_0515000
SSTP_0000528900		SRAE_1000077500		SPAL_0000941100		SVE_0564800
SSTP_0000537400		SRAE_1000095600		SPAL_0000957800		SVE_0576200
SSTP_0000543000		SRAE_1000101200		SPAL_0000972500		SVE_0586500
SSTP_0000546200		SRAE_1000103600		SPAL_0000982400		SVE_0587300
SSTP_0000549100		SRAE_1000111700		SPAL_0000996900		SVE_0587600
SSTP_0000554600		SRAE_1000231000		SPAL_0000997100		SVE_0594400
SSTP_0000554700		SRAE_1000236400		SPAL_0000997200		SVE_0598500
SSTP_0000564300		SRAE_1000261000		SPAL_0001029300		SVE_0623400
SSTP_0000570800		SRAE_1000274300		SPAL_0001048250		SVE_0624200
SSTP_0000572800		SRAE_1000274400		SPAL_0001056600		SVE_0628800
SSTP_0000607500		SRAE_1000279900		SPAL_0001066000		SVE_0641900
SSTP_0000621600		SRAE_1000292700		SPAL_0001067350		SVE_0642100
SSTP_0000628800		SRAE_1000292800		SPAL_0001089000		SVE_0642400
SSTP_0000646100		SRAE_1000304500		SPAL_0001089700		SVE_0642600
SSTP_0000648600		SRAE_1000352800		SPAL_0001100700		SVE_0648200
SSTP_0000648700		SRAE_1000353700		SPAL_0001103400		SVE_0654400
SSTP_0000662500		SRAE_2000002900		SPAL_0001126700		SVE_0654600
SSTP_0000668300		SRAE_2000187500		SPAL_0001135900		SVE_0655900
SSTP_0000668700		SRAE_2000359700		SPAL_0001145300		SVE_0664200
SSTP_0000674600		SRAE_2000369900		SPAL_0001160450		SVE_0668600
SSTP_0000683400		SRAE_2000388500		SPAL_0001168375		SVE_0684100
SSTP_0000686100		SRAE_2000389400		SPAL_0001168800		SVE_0685200
SSTP_0000697000		SRAE_2000414400		SPAL_0001177825		SVE_0690200
SSTP_0000697300		SRAE_2000421000		SPAL_0001179000		SVE_0695200
SSTP_0000732800		SRAE_2000423800		SPAL_0001205400		SVE_0716300
SSTP_0000738200		SRAE_2000425500		SPAL_0001210700		SVE_0716400
SSTP_0000739800		SRAE_2000425700		SPAL_0001222200		SVE_0731300
SSTP_0000777700		SRAE_2000425800		SPAL_0001229000		SVE_0731600
SSTP_0000816000		SRAE_2000430900		SPAL_0001229050		SVE_0755400
SSTP_0000836800		SRAE_2000432900		SPAL_0001230800		SVE_0762400
SSTP_0000837100		SRAE_2000436700		SPAL_0001240800		SVE_0834500
SSTP_0000860100		SRAE_2000441100		SPAL_0001245700		SVE_0847700
SSTP_0000872100		SRAE_2000446800		SPAL_0001253600		SVE_0862900
SSTP_0000924650		SRAE_2000446900		SPAL_0001256100		SVE_0863000
SSTP_0000934300		SRAE_2000449100		SPAL_0001294500		SVE_0863100
SSTP_0000937700		SRAE_2000450100		SPAL_0001298400		SVE_0867900
SSTP_0000941900		SRAE_2000450200		SPAL_0001301050		SVE_0872500
SSTP_0000949000		SRAE_2000463650		SPAL_0001301100		SVE_0878300
SSTP_0000956800		SRAE_2000467000		SPAL_0001309500		SVE_0883500
SSTP_0000958500		SRAE_2000467200		SPAL_0001313400		SVE_0883800
SSTP_0000959400		SRAE_2000471200		SPAL_0001320200		SVE_0886800
SSTP_0000963700		SRAE_2000471650		SPAL_0001355100		SVE_0899200
SSTP_0000963800		SRAE_2000474450		SPAL_0001355200		SVE_0900100
SSTP_0000964100		SRAE_2000476900		SPAL_0001383200		SVE_0900900
SSTP_0000992500		SRAE_2000478200		SPAL_0001430700		SVE_0970200
SSTP_0000992700		SRAE_2000478750		SPAL_0001491300		SVE_0996500
SSTP_0000993200		SRAE_2000482800		SPAL_0001515000		SVE_0997500
SSTP_0000995100		SRAE_2000498500		SPAL_0001518500		SVE_1000654750
SSTP_0000996700		SRAE_2000506200		SPAL_0001526300		SVE_1009200
SSTP_0001007400		SRAE_2000514400		SPAL_0001529975		SVE_1021000
SSTP_0001016200		SRAE_2000520750		SPAL_0001591200		SVE_1021500
SSTP_0001016700		SRAE_2000523100		SPAL_0001643700		SVE_1029300
SSTP_0001018500		SRAE_2000523200		SPAL_0001645100		SVE_1030800
SSTP_0001019900		SRAE_2000526100		SPAL_0001685400		SVE_1036800
SSTP_0001040050		SRAE_X000024800		SPAL_0001694050		SVE_1042900
SSTP_0001040100		SRAE_X000044600		SPAL_0001709600		SVE_1056900
SSTP_0001048100		SRAE_X000065100		SPAL_0001719200		SVE_1077100
SSTP_0001055600		SRAE_X000074800		SPAL_0001732200		SVE_1080000
SSTP_0001059800		SRAE_X000114200		SPAL_0001747500		SVE_1080100
SSTP_0001060500		SRAE_X000197650		SPAL_0001749150		SVE_1102700
SSTP_0001065400		SRAE_X000223300		SPAL_0001749300		SVE_1103100
SSTP_0001086200				SPAL_0001751500		SVE_1105400
SSTP_0001106100				SPAL_0001764600		SVE_1123500
SSTP_0001110100				SPAL_0001772500		SVE_1157700
SSTP_0001110500						SVE_1183400
SSTP_0001111100						SVE_1217800
SSTP_0001111200						SVE_1223800
SSTP_0001112600						SVE_1276100
SSTP_0001115800						SVE_1443300
SSTP_0001115900						SVE_1566300
SSTP_0001116900						SVE_1568900
SSTP_0001159500						SVE_1569200
SSTP_0001161000						SVE_1576000
SSTP_0001163500						SVE_1578700
SSTP_0001168000						SVE_1578900
SSTP_0001168100						SVE_1582300
SSTP_0001172200						SVE_1647600
SSTP_0001173300						SVE_1648600
SSTP_0001182400						SVE_1653700
SSTP_0001185400						SVE_1655200
SSTP_0001186800						SVE_1655300
SSTP_0001190900						SVE_1655800
SSTP_0001196800						SVE_1686500
SSTP_0001206500						SVE_1707600
SSTP_0001210000						SVE_1746200
SSTP_0001213200						SVE_1767700
SSTP_0001213300						SVE_1853900
SSTP_0001218500						SVE_1857100
SSTP_0001219200						SVE_1858900
SSTP_0001250400						SVE_1889700
SSTP_0001261400						SVE_1893800
SSTP_0001268850						SVE_1944100
SSTP_0001282300						SVE_1946900
SSTP_0001282400						SVE_1947000
SSTP_0001282500						SVE_1947100
SSTP_0001282800						SVE_1947200
SSTP_0001285000						SVE_1951000
						SVE_1951800
						SVE_1971800
						SVE_1992200
						SVE_1992600
						SVE_1994800
						SVE_1994900
						SVE_1999400
						SVE_2000010633
						SVE_2000010666
						SVE_2002500
						SVE_2010500
						SVE_2013200
						SVE_2018100
						SVE_2019100
						SVE_2019500
						SVE_2019600
						SVE_2021400
						SVE_2021500
						SVE_2022200
						SVE_2022700
						SVE_2026500
						SVE_2027400
